# Supplementary material
Source: HighWire-hosted journal article supplement (https://gut.bmj.com/content/69/7/1229)
Supplement: inline-supplementary-material-1 [file inline-supplementary-material-1.xlsx]

## Sheet: Legends
Supplementary table	Legend
Supplementary Table 1	Bioclinical Characteristics of PWS patients with partial deletion or uniparental disomy of chromosome 15.
Supplementary Table 2	Permutated analysis of variance using distance matrices between groups PWS, OC and PWS Parents.
Supplementary Table 3	Statistics on relative abundance on L6 level of the groups PWS, OC and PWS parents. Test for differential of abundance using wilcoxon rank sum test between PWS and OC (n=17+17) and between OC and PWS Parents (n=17+24)
Supplementary Table 4	Clinical Characteristics of OC subjects and PWS patients in subpopulation with complete set of metabolic parameters
Supplementary Table 5	Results from distance-based Redundance Analysis of microbiota of PWS and OC, testing if factors and variables significantly explain compositional variation using Bray-Curtis dissimilarity (n=12+14)
Supplementary Table 6	Blast results from OTUs in Figure 2A
Supplementary Table 7	Blast results from OTUs with significant correlations to clinical parameters in Figure 2B
Supplementary Table 8	Blast results from OTUs with significant differential abundance between PWS and OC
Supplementary Table 9	Permutated analysis of variance using distance matrices between type of genotype in PWS (disomy or deletion).
Supplementary Table 10	Clinical parameters and relative abundance of significant genera in donors for FMT. Relative abundance in mice of OTUs related to donor phenotype. OTUs which are still significant after FTM between groups.

## Sheet: Supplementary Table 1
		Deletion	Disomy	p-values
		(n = 12)	(n = 5)
	BFMI	19.2	15.7	0.384
	Fat mass (%. DEXA)	48.4	44.5	0.355
	Age (year)	27.5	28.4	0.83
	Weight (kg)	93.1	75.1	0.136
	Height (cm)	156.1	152.2	0.407
	BMI	38.7	33.2	0.363
	fat mass (kg)	46.1	35.1	0.183
	Androgen fat (%)	59.3	59.4	0.989
	Fastin glycemia (mmol/l)	4.6	4.4	0.724
	Fasting insulin (mUI)	10.2	6.2	0.169
	HOMA-IR	2	1.3	0.276
	HBA1c (%)	5.9	5.4	0.149
	HDL-c (mmol/l)	1.1	1.3	0.376
	LDL-c (mmol/l)	3	3	1
	Triglycerides (mmol/l)	1.1	0.6	0.012
	Leptin (ng/ml)	44.3	28.4	0.255
	C-reactive Protein	10.9	16	0.584

## Sheet: Supplementary Table 2
adonis, 9999 permutations
		weighted unifrac		unweighted unifrac		Bray Curts
		R2	P	R2	P	R2	P	n
	All	0.0859	0.0134	0.12443	0.0001	0.06046	0.0007	17+17+24
	OC vs. PWS parents	0.10164	0.0038	0.1169	0.0001	0.0623	0.0001	17+24
	PWS vs. PWS parents	0.02067	0.601	0.03058	0.1472	0.02484	0.473	17+24
	PWS vs. OC	0.06031	0.0933	0.17176	0.0002	0.10902	0.0005	17+17
	PWS vs. OC	0.08551	0.085	0.14881	0.001		0.001	14+12(PWS)

## Sheet: Supplementary Table 3
Wilxcoxon rank sum test on L6 level PWS vs. OC												Genus	Family	Order	Class	Phylum	Kingdom
	mean_PWS	mean_OC	median_PWS	median_OC	prevalence_PWS	prevalence_OC	log2FC_median	log2FC_mean	p.value	p.adjust	Annotation	L6	L5	L4	L3	L2	L1
k__Archaea;p__Euryarchaeota;c__Methanobacteria;o__Methanobacteriales;f__Methanobacteriaceae;g__Methanobrevibacter	0.00153849	0.000635511	0.000365812	0	70.5882	29.4118	8.5189	1.2742	0.0136404	0.0425037	Methanobrevibacter	Methanobrevibacter	Methanobacteriaceae	Methanobacteriales	Methanobacteria	Euryarchaeota	Archaea
k__Archaea;p__Euryarchaeota;c__Thermoplasmata;o__E2;f__[Methanomassiliicoccaceae];g__vadinCA11	0.000532149	0	1.23e-05	0	52.9412	0	3.73335	9.05839	0.000746981	0.0112746	vadinCA11	vadinCA11	[Methanomassiliicoccaceae]	E2	Thermoplasmata	Euryarchaeota	Archaea
k__Bacteria;p__Bacteroidetes;c__Bacteroidia;o__Bacteroidales;f__Rikenellaceae;g__	0.00861982	0.00321534	0.00381842	0.00126345	100	100	1.59484	1.42241	0.0094945	0.0382812	Rikenellaceae		Rikenellaceae	Bacteroidales	Bacteroidia	Bacteroidetes	Bacteria
k__Bacteria;p__Firmicutes;c__Clostridia;o__Clostridiales;f__Christensenellaceae;g__	0.00445883	0.00218146	0.00281652	0.000116144	100	70.5882	4.58807	1.03103	0.00104862	0.0112746	Christensenellaceae		Christensenellaceae	Clostridiales	Clostridia	Firmicutes	Bacteria
k__Bacteria;p__Firmicutes;c__Clostridia;o__Clostridiales;f__Lachnospiraceae;g__Dorea	0.00753427	0.0135384	0.00663456	0.0113324	100	100	-0.772287	-0.845437	0.0144949	0.0425037	Dorea	Dorea	Lachnospiraceae	Clostridiales	Clostridia	Firmicutes	Bacteria
k__Bacteria;p__Lentisphaerae;c__[Lentisphaeria];o__Victivallales;f__Victivallaceae;g__	0.00103126	0.000123225	0.000107531	0	76.4706	35.2941	6.76196	3.05478	0.00619201	0.03185	Victivallaceae		Victivallaceae	Victivallales	[Lentisphaeria]	Lentisphaerae	Bacteria
k__Bacteria;p__Proteobacteria;c__Deltaproteobacteria;o__Desulfovibrionales;f__Desulfovibrionaceae;g__Desulfovibrio	0.00622423	0.000392601	0.000287424	0	76.4706	47.0588	8.17205	3.98332	0.0118538	0.0424832	Desulfovibrio	Desulfovibrio	Desulfovibrionaceae	Desulfovibrionales	Deltaproteobateria	Proteobacteria	Bacteria
k__Bacteria;p__Tenericutes;c__Mollicutes;o__Anaeroplasmatales;f__Anaeroplasmataceae;g__	0.0028487	1.03469e-05	2.25e-05	0	58.8235	11.7647	4.55459	7.97236	0.00446603	0.0288108	Anaeroplasmataceae		Anaeroplasmataceae	Anaeroplasmatales	Mollicutes	Tenericutes	Bacteria
k__Bacteria;p__Tenericutes;c__Mollicutes;o__RF39;f__;g__	0.00541371	0.000706279	0.00255007	0	82.3529	29.4118	11.3169	2.93653	0.000920575	0.0112746	RF39			RF39	Mollicutes	Tenericutes	Bacteria
k__Bacteria;p__Tenericutes;c__RF3;o__ML615J-28;f__;g__	0.00111884	0.000120066	2.46e-05	0	64.7059	17.6471	4.67807	3.20942	0.006912	0.03185	ML615J-28			ML615J-28	RF3	Tenericutes	Bacteria
k__Bacteria;p__Verrucomicrobia;c__Verrucomicrobiae;o__Verrucomicrobiales;f__Verrucomicrobiaceae;g__Akkermansia	0.00716801	0.000218812	0.00104785	3.58e-05	94.1176	70.5882	4.83296	5.02743	0.00177354	0.0143016	Akkermansia	Akkermansia	VerrucomicrOCiaceae	VerrucomicrOCiales	VerrucomicrOCiae	VerrucomicrOCia	Bacteria
Wilxcoxon rank sum test on L6 level PWS parents vs. OC
	mean_PWS parents	mean_OC	median_PWS parents	median_OC	prevalence_PWS parents	prevalence_OC	log2FC_median	log2FC_mean	p.value	p.adjust	Annotation	L6	L5	L4	L3	L2	L1
k__Bacteria;p__Firmicutes;c__Clostridia;o__Clostridiales;f__Ruminococcaceae;g__	0.130363	0.0704323	0.125162	0.056329	100	100	1.15184	0.888214	0.000992486	0.0135966	Ruminococcaceae		Ruminococcaceae	Clostridiales	Clostridia	Firmicutes	Bacteria
k__Bacteria;p__Bacteroidetes;c__Bacteroidia;o__Bacteroidales;f__[Odoribacteraceae];g__Odoribacter	0.000745551	0.000364627	0.000776781	0.00017548	100	70.5882	2.13986	1.02987	0.00564404	0.0257736	Odoribacter	Odoribacter	[Odoribacteraceae]	Bacteroidales	Bacteroidia	Bacteroidetes	Bacteria
k__Bacteria;p__Bacteroidetes;c__Bacteroidia;o__Bacteroidales;f__Rikenellaceae;g__	0.0108725	0.00321534	0.00709225	0.00126345	100	100	2.48793	1.75732	0.0030126	0.0154767	Rikenellaceae		Rikenellaceae	Bacteroidales	Bacteroidia	Bacteroidetes	Bacteria
k__Bacteria;p__Firmicutes;c__Clostridia;o__Clostridiales;f__Christensenellaceae;g__	0.00939918	0.00218146	0.00211446	0.000116144	100	70.5882	4.17462	2.10673	0.000547425	0.0112492	Christensenellaceae		Christensenellaceae	Clostridiales	Clostridia	Firmicutes	Bacteria
k__Bacteria;p__Tenericutes;c__Mollicutes;o__Anaeroplasmatales;f__Anaeroplasmataceae;g__	0.00174155	1.03469e-05	1.79e-05	0	62.5	11.7647	4.24031	7.26275	0.00139338	0.0143166	Anaeroplasmataceae		Anaeroplasmataceae	Anaeroplasmatales	Mollicutes	Tenericutes	Bacteria
k__Bacteria;p__Verrucomicrobia;c__Verrucomicrobiae;o__Verrucomicrobiales;f__Verrucomicrobiaceae;g__Akkermansia	0.0126909	0.000218812	0.00151093	3.58e-05	100	70.5882	5.36054	5.85149	6.71608e-05	0.00276022	Akkermansia	Akkermansia	Verrucomicrobiaceae	Verrucomicrobiales	Verrucomicrobiae	Verrucomicrobia	Bacteria
k__Bacteria;p__Lentisphaerae;c__[Lentisphaeria];o__Victivallales;f__Victivallaceae;g__	0.000924509	0.000123225	0.000235902	0	79.1667	35.2941	7.88815	2.8973	0.00245826	0.0154767	Victivallaceae		Victivallaceae	Victivallales	[Lentisphaeria]	Lentisphaerae	Bacteria
k__Bacteria;p__Tenericutes;c__Mollicutes;o__RF39;f__;g__	0.00799961	0.000706279	0.00144477	0	75	29.4118	10.4976	3.49976	0.00245934	0.0154767	RF39			RF39	Mollicutes	Tenericutes	Bacteria
k__Bacteria;p__Proteobacteria;c__Deltaproteobacteria;o__Desulfovibrionales;f__Desulfovibrionaceae;g__Desulfovibrio	0.00467804	0.000392601	0.00313817	0	75	47.0588	11.6162	3.57141	0.00296786	0.0154767	Desulfovibrio	Desulfovibrio	Desulfovibrionaceae	Desulfovibrionales	Deltaproteobacteria	Proteobacteria	Bacteria
No OTUs or genera (L6-level) significantly different in abundance between PWS and PWS parents

## Sheet: Supplementary Table 4
		OC	PWS	p-values
		(n=14)	(n=12)
	Female gender	0.65	0.59
	T2D	0.15	0.17
	BFMI	20.1 ± 5.8	17.4 ± 7.7	0.3367
	Fat mass (%. DEXA)	47.8 ± 6.8	46.8 ± 7.1	0.7074
	Age (year)	31.5 ± 8.4	29.4 ± 6.4	0.4808
	Weight (kg)	118.2 ± 30.6	86.8 ± 23.4	0.0069
	Height (cm)	166 ± 8.8	155.6 ± 7.1	0.0026
	BMI	42.6 ± 8.7	36.7 ± 10.9	0.1466
	fat mass (kg)	55.6 ± 17.7	41.4 ± 16.4	0.0452
	Androgen fat (%)	55.3 ± 7.5	58.9 ± 4.6	0.1879
	Fastin glycemia (mmol/l)	5 ± 0.5	4.4 ± 0.8	0.0239
	Fasting insulin (mUI)	19.5 ± 15.2	9.1 ± 5.4	0.0283
	HOMA-IR	4.5 ± 3.5	1.8 ± 1.1	0.016
	HBA1c (%)	5.6 ± 0.7	5.6 ± 0.4	0.8547
	HDL-c (mmol/l)	1.3 ± 0.4	1.2 ± 0.3	0.735
	LDL-c (mmol/l)	2.6 ± 0.8	3 ± 0.6	0.2753
	Triglycerides (mmol/l)	1.3 ± 0.7	0.9 ± 0.4	0.0856
	Leptin (ng/ml)	51.5 ± 29.1	35.2 ± 23	0.1244
	C-reactive Protein	6.8 ± 3.9	10.3 ± 12.3	0.4542
	The values in Table indicate average value ± the standard deviation for continuous variables and percentage for factorial.
	P indicate significant differences in variable between OC and PWS using t-test, significant p-values are in bold (alpha=0.05). Body fat mass index (BFMI) is calculated as Body fat (kg) /height (m2).

## Sheet: Supplementary Table 5
			P	Constrained variance
	TG		0.002	0.09591
	PD		0.001	0.1559
	HOMA.IR		0.04	0.06749
	Insulin		0.082
	Leptin		0.997
	LDL		0.566
	HDL		0.791
	HBA1c		0.119
	BMI		0.619
	FMI		0.465
	Gender		0.697
	fat mass (kg)		0.23
	weight (kg)		0.19
	HOMA.IR+TG+PD		0.001	0.2537
	HOMA.IR		0.021
	TG		0.001
	PD_whole_tree		0.001
	CAP1		0.001
	CAP2		0.233
	CAP3		0.522

## Sheet: Supplementary Table 6
									Results BLAST of represented sequence of OTU
otuid	CAP1	Annotation	L6	L5	L4	L3	L2	L1	OTU.id	Subject.Seq.id	Percentage.of.identical.matches	Expect.value	Subject.Taxonomy.ID	Subject.Scientific.Name	Subject.Common.Name	Subject.Super.Kingdom	Subject.Title
3600504	-3.19541	3600504_Bacteroides	Bacteroides	Bacteroidaceae	Bacteroidales	Bacteroidia	Bacteroidetes	Bacteria	3600504	gi|444304091|ref|NR_074515.1|	100	7.07e-132	821	Bacteroides vulgatus	Bacteroides vulgatus	Bacteria	Bacteroides vulgatus strain ATCC 8482 16S ribosomal RNA, partial sequence
	-3.19541									gi|631251748|ref|NR_112946.1|	100	7.07e-132	821	Bacteroides vulgatus	Bacteroides vulgatus	Bacteria	Bacteroides vulgatus strain JCM 5826 16S ribosomal RNA gene, partial sequence
	-3.19541									gi|631250946|ref|NR_112143.1|	100	7.07e-132	821	Bacteroides vulgatus	Bacteroides vulgatus	Bacteria	Bacteroides vulgatus strain JCM 5826 16S ribosomal RNA gene, partial sequence
195937	-1.80478	195937_Blautia	Blautia	Lachnospiraceae	Clostridiales	Clostridia	Firmicutes	Bacteria	195937	gi|343201234|ref|NR_041960.1|	99.606	3.29e-130	89014	Blautia luti	Blautia luti	Bacteria	Blautia luti strain BInIX 16S ribosomal RNA, partial sequence
4436552	-1.54171	4436552_Prevotella	Prevotella	Prevotellaceae	Bacteroidales	Bacteroidia	Bacteroidetes	Bacteria	4436552	gi|631252213|ref|NR_113411.1|	100	7.07e-132	537011	Prevotella copri DSM 18205	Prevotella copri DSM 18205	Bacteria	Prevotella copri strain JCM 13464 16S ribosomal RNA gene, partial sequence
	-1.54171									gi|343200190|ref|NR_040877.1|	100	7.07e-132	537011	Prevotella copri DSM 18205	Prevotella copri DSM 18205	Bacteria	Prevotella copri strain CB7 16S ribosomal RNA gene, partial sequence
2829179	-1.09051	2829179_Acidaminococcus	Acidaminococcus	Veillonellaceae	Clostridiales	Clostridia	Firmicutes	Bacteria	2829179	gi|343198461|ref|NR_041894.1|	100	2.53e-131	187327	Acidaminococcus intestini	Acidaminococcus intestini	Bacteria	Acidaminococcus intestini strain ADV 255.99 16S ribosomal RNA gene, partial sequence
825808	-1.05443	825808_Bifidobacterium	Bifidobacterium	Bifidobacteriaceae	Bifidobacteriales	Actinobacteria	Actinobacteria	Bacteria	825808	gi|310975253|ref|NR_037117.1|	100	7.07e-132	28026	Bifidobacterium pseudocatenulatum	Bifidobacterium pseudocatenulatum	Bacteria	Bifidobacterium pseudocatenulatum strain B1279 16S ribosomal RNA gene, partial sequence
	-1.05443									gi|631251581|ref|NR_112779.1|	100	7.07e-132	1150460	Bifidobacterium kashiwanohense JCM 15439	Bifidobacterium kashiwanohense JCM 15439	Bacteria	Bifidobacterium kashiwanohense strain HM2-2 16S ribosomal RNA gene, partial sequence
	-1.05443									gi|343201160|ref|NR_041875.1|	100	7.07e-132	1686	Bifidobacterium catenulatum	Bifidobacterium catenulatum	Bacteria	Bifidobacterium catenulatum strain DSM 16992 16S ribosomal RNA gene, partial sequence
	-1.05443									gi|310975254|ref|NR_037118.1|	100	7.07e-132	78342	Bifidobacterium gallicum	Bifidobacterium gallicum	Bacteria	Bifidobacterium gallicum strain P6 16S ribosomal RNA gene, partial sequence
197004	-1.01721	197004_Lachnospiraceae		Lachnospiraceae	Clostridiales	Clostridia	Firmicutes	Bacteria	197004	gi|444304209|ref|NR_074634.1|	100	7.07e-132	39491	Eubacterium rectale	Eubacterium rectale	Bacteria	[Eubacterium] rectale strain ATCC 33656 16S ribosomal RNA, partial sequence
289734	-0.967426	289734_Lachnospiraceae		Lachnospiraceae	Clostridiales	Clostridia	Firmicutes	Bacteria	289734	gi|343205678|ref|NR_044054.1|	100	7.07e-132	1121115	Blautia wexlerae DSM 19850	Blautia wexlerae DSM 19850	Bacteria	Blautia wexlerae strain DSM 19850 16S ribosomal RNA gene, partial sequence
72820	-0.962187	72820_Bifidobacterium	Bifidobacterium	Bifidobacteriaceae	Bifidobacteriales	Actinobacteria	Actinobacteria	Bacteria	72820	gi|545589064|ref|NR_044691.2|	99.605	9.14e-131	216816	Bifidobacterium longum	Bifidobacterium longum	Bacteria	Bifidobacterium longum strain ATCC 15707 16S ribosomal RNA, partial sequence
2724175	-0.957819	2724175_Lachnospiraceae		Lachnospiraceae	Clostridiales	Clostridia	Firmicutes	Bacteria	2724175	gi|310974936|ref|NR_036800.1|	100	7.07e-132	411470	Ruminococcus gnavus ATCC 29149	Ruminococcus gnavus ATCC 29149	Bacteria	[Ruminococcus] gnavus strain ATCC 29149 16S ribosomal RNA gene, partial sequence
	-0.957819									gi|645321810|ref|NR_118690.1|	100	7.07e-132	33038	[Ruminococcus] gnavus	[Ruminococcus] gnavus	Bacteria	[Ruminococcus] gnavus strain ATCC 29149 16S ribosomal RNA, partial sequence
4483337	-0.860765	4483337_Lachnospiraceae		Lachnospiraceae	Clostridiales	Clostridia	Firmicutes	Bacteria	4483337	gi|1441204227|ref|NR_157642.1|	95.652	1.56e-113	1653435	Clostridium sp. BR31	Clostridium sp. BR31	Bacteria	Merdimonas faecis strain BR31 16S ribosomal RNA, partial sequence
	-0.860765									gi|1397641798|ref|NR_156907.1|	95.652	1.56e-113	1912855	Ruminococcus sp. JCM 30896	Ruminococcus sp. JCM 30896	Bacteria	Faecalimonas umbilicata strain EGH7 16S ribosomal RNA, partial sequence
	-0.860765									gi|310975204|ref|NR_037068.1|	95.652	1.56e-113	29375	Clostridium xylanolyticum	Clostridium xylanolyticum	Bacteria	[Clostridium] xylanolyticum strain DSM 6555 16S ribosomal RNA gene, partial sequence
	-0.860765									gi|219846508|ref|NR_026100.1|	95.652	1.56e-113	1286362	Clostridium celerecrescens 18A	Clostridium celerecrescens 18A	Bacteria	[Clostridium] celerecrescens strain 18A 16S ribosomal RNA gene, partial sequence
	-0.860765									gi|631251457|ref|NR_112654.1|	95.652	1.56e-113	1286362	Clostridium celerecrescens 18A	Clostridium celerecrescens 18A	Bacteria	[Clostridium] celerecrescens strain 18A 16S ribosomal RNA gene, partial sequence
	-0.860765									gi|631250977|ref|NR_112174.1|	95.652	1.56e-113	1297793	Clostridium sphenoides JCM 1415	Clostridium sphenoides JCM 1415	Bacteria	[Clostridium] sphenoides strain ATCC 19403 16S ribosomal RNA gene, partial sequence
	-0.860765									gi|265678424|ref|NR_028726.1|	95.652	1.56e-113	94868	Clostridium algidixylanolyticum	Clostridium algidixylanolyticum	Bacteria	[Clostridium] algidixylanolyticum strain SPL73 16S ribosomal RNA gene, partial sequence
	-0.860765									gi|219846817|ref|NR_026409.1|	95.652	1.56e-113	58134	Desulfotomaculum guttoideum	Desulfotomaculum guttoideum	Bacteria	[Desulfotomaculum] guttoideum strain DSM 4024 16S ribosomal RNA gene, partial sequence
4481613	-0.833003	4481613_Collinsella	Collinsella	Coriobacteriaceae	Coriobacteriales	Coriobacteriia	Actinobacteria	Bacteria	4481613	gi|631252118|ref|NR_113316.1|	100	7.07e-132	74426	Collinsella aerofaciens	Collinsella aerofaciens	Bacteria	Collinsella aerofaciens strain JCM 10188 16S ribosomal RNA gene, partial sequence
4347159	-0.729927	4347159_Bifidobacterium	Bifidobacterium	Bifidobacteriaceae	Bifidobacteriales	Actinobacteria	Actinobacteria	Bacteria	4347159	gi|1269801543|ref|NR_074802.2|	100	7.07e-132	1680	Bifidobacterium adolescentis	Bifidobacterium adolescentis	Bacteria	Bifidobacterium adolescentis strain ATCC 15703 16S ribosomal RNA, complete sequence
	-0.729927									gi|961555015|ref|NR_133982.1|	100	7.07e-132	1454229	Bifidobacterium sp. CU3-7	Bifidobacterium sp. CU3-7	Bacteria	Bifidobacterium faecale strain CU3-7 16S ribosomal RNA, partial sequence
	-0.729927									gi|645321680|ref|NR_118589.1|	100	7.07e-132	1437612	Bifidobacterium stercoris JCM 15918	Bifidobacterium stercoris JCM 15918	Bacteria	Bifidobacterium stercoris strain Eg1 16S ribosomal RNA gene, partial sequence
	-0.729927									gi|636560686|ref|NR_116746.1|	100	7.07e-132	1437612	Bifidobacterium stercoris JCM 15918	Bifidobacterium stercoris JCM 15918	Bacteria	Bifidobacterium stercoris strain Eg1 16S ribosomal RNA gene, partial sequence
1820513	-0.511505	1820513_Sutterella	Sutterella	Alcaligenaceae	Burkholderiales	Betaproteobacteria	Proteobacteria	Bacteria	1820513	gi|645320614|ref|NR_117778.1|	100	7.07e-132	40545	Sutterella wadsworthensis	Sutterella wadsworthensis	Bacteria	Sutterella wadsworthensis strain WAL 9799 16S ribosomal RNA gene, partial sequence
	-0.511505									gi|559795260|ref|NR_104851.1|	100	7.07e-132	40545	Sutterella wadsworthensis	Sutterella wadsworthensis	Bacteria	Sutterella wadsworthensis strain WAL 9799 16S ribosomal RNA gene, partial sequence
4447950	-0.469221	4447950_Bacteroides	Bacteroides	Bacteroidaceae	Bacteroidales	Bacteroidia	Bacteroidetes	Bacteria	4447950	gi|631251745|ref|NR_112943.1|	100	7.07e-132	449673	Bacteroides stercoris ATCC 43183	Bacteroides stercoris ATCC 43183	Bacteria	Bacteroides stercoris strain JCM 9496 16S ribosomal RNA gene, partial sequence
	-0.469221									gi|224581415|ref|NR_027196.1|	100	7.07e-132	449673	Bacteroides stercoris ATCC 43183	Bacteroides stercoris ATCC 43183	Bacteria	Bacteroides stercoris strain ATCC 43183 16S ribosomal RNA gene, partial sequence
188047	-0.458522	188047_Coprococcus	Coprococcus	Lachnospiraceae	Clostridiales	Clostridia	Firmicutes	Bacteria	188047	gi|265678578|ref|NR_028883.1|	99.606	3.29e-130	88431	Dorea longicatena	Dorea longicatena	Bacteria	Dorea longicatena strain 111-35 16S ribosomal RNA gene, partial sequence
185575	0.440432	185575_Ruminococcaceae		Ruminococcaceae	Clostridiales	Clostridia	Firmicutes	Bacteria	185575	gi|265678656|ref|NR_028961.1|	95.652	1.56e-113	853	Faecalibacterium prausnitzii	Faecalibacterium prausnitzii	Bacteria	Faecalibacterium prausnitzii strain ATCC 27768 16S ribosomal RNA gene, partial sequence
176269	0.442582	176269_Lachnospira	Lachnospira	Lachnospiraceae	Clostridiales	Clostridia	Firmicutes	Bacteria	176269	gi|444304189|ref|NR_074613.1|	100	7.07e-132	39485	Eubacterium eligens	Eubacterium eligens	Bacteria	[Eubacterium] eligens strain ATCC 27750 16S ribosomal RNA, partial sequence
4295707	0.488839	4295707_[Eubacterium]	[Eubacterium]	Erysipelotrichaceae	Erysipelotrichales	Erysipelotrichi	Firmicutes	Bacteria	4295707	gi|602269354|ref|NR_044731.2|	97.628	7.17e-122	1735	[Eubacterium] biforme	[Eubacterium] biforme	Bacteria	Holdemanella biformis strain DSM 3989 16S ribosomal RNA, partial sequence
4410166	0.733327	4410166_Prevotella	Prevotella	Prevotellaceae	Bacteroidales	Bacteroidia	Bacteroidetes	Bacteria	4410166	gi|631252213|ref|NR_113411.1|	99.209	1.53e-128	537011	Prevotella copri DSM 18205	Prevotella copri DSM 18205	Bacteria	Prevotella copri strain JCM 13464 16S ribosomal RNA gene, partial sequence
	0.733327									gi|343200190|ref|NR_040877.1|	99.209	1.53e-128	537011	Prevotella copri DSM 18205	Prevotella copri DSM 18205	Bacteria	Prevotella copri strain CB7 16S ribosomal RNA gene, partial sequence
173810	0.802471	173810_Ruminococcaceae		Ruminococcaceae	Clostridiales	Clostridia	Firmicutes	Bacteria	173810	gi|507148077|ref|NR_102884.1|	94.862	3.38e-110	1161942	Ruminococcus champanellensis	Ruminococcus champanellensis	Bacteria	Ruminococcus champanellensis strain 18P13 16S ribosomal RNA, partial sequence
173810	0.802471	173810_Ruminococcaceae		Ruminococcaceae	Clostridiales	Clostridia	Firmicutes	Bacteria	173810	gi|636558832|ref|NR_114889.1|	94.862	3.38e-110	213810	Ruminococcus champanellensis 18P13	Ruminococcus champanellensis 18P13	Bacteria	Ruminococcus champanellensis strain 18P13 16S ribosomal RNA gene, partial sequence
3275562	0.825124	3275562_Lachnospiraceae		Lachnospiraceae	Clostridiales	Clostridia	Firmicutes	Bacteria	3275562	gi|559795307|ref|NR_104899.1|	98.024	1.54e-123	384636	Bacteroides xylanolyticus	Bacteroides xylanolyticus	Bacteria	Bacteroides xylanolyticus strain X5-1 16S ribosomal RNA gene, partial sequence
181059	0.880857	181059_Clostridiales			Clostridiales	Clostridia	Firmicutes	Bacteria	181059	gi|636559633|ref|NR_115693.1|	87.008	7.64e-77	694434	Gracilibacter thermotolerans JW/YJL-S1	Gracilibacter thermotolerans JW/YJL-S1	Bacteria	Gracilibacter thermotolerans strain JW/YJL-S1 16S ribosomal RNA gene, partial sequence
	0.880857									gi|636559632|ref|NR_115692.1|	87.008	7.64e-77	694434	Gracilibacter thermotolerans JW/YJL-S1	Gracilibacter thermotolerans JW/YJL-S1	Bacteria	Gracilibacter thermotolerans strain JW/YJL-S1 16S ribosomal RNA gene, partial sequence
	0.880857									gi|636559631|ref|NR_115691.1|	87.008	7.64e-77	694434	Gracilibacter thermotolerans JW/YJL-S1	Gracilibacter thermotolerans JW/YJL-S1	Bacteria	Gracilibacter thermotolerans strain JW/YJL-S1 16S ribosomal RNA gene, partial sequence
	0.880857									gi|636559630|ref|NR_115690.1|	87.008	7.64e-77	694434	Gracilibacter thermotolerans JW/YJL-S1	Gracilibacter thermotolerans JW/YJL-S1	Bacteria	Gracilibacter thermotolerans strain JW/YJL-S1 16S ribosomal RNA gene, partial sequence
	0.880857									gi|343198739|ref|NR_043559.1|	87.008	7.64e-77	694434	Gracilibacter thermotolerans JW/YJL-S1	Gracilibacter thermotolerans JW/YJL-S1	Bacteria	Gracilibacter thermotolerans strain JW/YJL-S1 16S ribosomal RNA gene, partial sequence
185763	1.06239	185763_Faecalibacterium	Faecalibacterium	Ruminococcaceae	Clostridiales	Clostridia	Firmicutes	Bacteria	185763	gi|265678656|ref|NR_028961.1|	99.605	3.29e-130	853	Faecalibacterium prausnitzii	Faecalibacterium prausnitzii	Bacteria	Faecalibacterium prausnitzii strain ATCC 27768 16S ribosomal RNA gene, partial sequence

## Sheet: Supplementary Table 7
	Results wilcox rank sum test, PWC vs. OC (n=17+17)									Results spearman correlations (n=12+14)										Results BLAST of represented sequence of OTU
OTU-id	median_Ob-PW	median_Ob	prevalence_Ob-PW	prevalence_Ob	log2FC_median	p.value	padj	rho_PD	padj_PD	sign_level	rho_TG	padj_TG	sign_level_TG	rho_HOMA.IR	padj_HOMA.IR	sign_level_HOMA.IR	rho_Insulin	padj_Insulin	sign_level_Insulin	otuid	L6	L5	L4	L3	L2	L1	OTU-id	Subject Seq-id	Percentage of identical matches	Expect value	Subject Taxonomy ID	Subject Scientific Name	Subject Common Name	Subject Super Kingdom	Subject Title
3600504	0.00906692	0.0218563	100	100	-1.26844	0.0986874	0.154213	-0.435214	0.0212714	*	0.701778	0.00171569	*	0.294965	0.270828		0.386523	0.0958084	#	3600504_Bacteroides	Bacteroides	Bacteroidaceae	Bacteroidales	Bacteroidia	Bacteroidetes	Bacteria	3600504	gi|444304091|ref|NR_074515.1|	100	7.07e-132	821	Bacteroides vulgatus	Bacteroides vulgatus	Bacteria	Bacteroides vulgatus strain ATCC 8482 16S ribosomal RNA, partial sequence
																												gi|631251748|ref|NR_112946.1|	100	7.07e-132	821	Bacteroides vulgatus	Bacteroides vulgatus	Bacteria	Bacteroides vulgatus strain JCM 5826 16S ribosomal RNA gene, partial sequence
																												gi|631250946|ref|NR_112143.1|	100	7.07e-132	821	Bacteroides vulgatus	Bacteroides vulgatus	Bacteria	Bacteroides vulgatus strain JCM 5826 16S ribosomal RNA gene, partial sequence
3588390	0.000534045	0.00110228	88.2353	94.1176	-1.03172	0.0849422	0.147097	-0.461275	0.0163223	*	0.697965	0.00171569	*	0.292274	0.270828		0.398563	0.0862613	#	3588390_Bacteroides	Bacteroides	Bacteroidaceae	Bacteroidales	Bacteroidia	Bacteroidetes	Bacteria	3588390	gi|444304091|ref|NR_074515.1|	98.814	7.12e-127	821	Bacteroides vulgatus	Bacteroides vulgatus	Bacteria	Bacteroides vulgatus strain ATCC 8482 16S ribosomal RNA, partial sequence
																												gi|631251748|ref|NR_112946.1|	98.814	7.12e-127	821	Bacteroides vulgatus	Bacteroides vulgatus	Bacteria	Bacteroides vulgatus strain JCM 5826 16S ribosomal RNA gene, partial sequence
																												gi|631250946|ref|NR_112143.1|	98.814	7.12e-127	821	Bacteroides vulgatus	Bacteroides vulgatus	Bacteria	Bacteroides vulgatus strain JCM 5826 16S ribosomal RNA gene, partial sequence
192406	0.00140654	0.00168463	100	94.1176	-0.258601	0.972891	0.476232	-0.189744	0.130235		0.603967	0.00925575	*	0.284687	0.272387		0.401574	0.0851281	#	192406_Ruminococcaceae		Ruminococcaceae	Clostridiales	Clostridia	Firmicutes	Bacteria	192406	gi|1277396349|ref|NR_152060.1|	99.605	3.29e-130	1712515	Butyricicoccus sp. KS-2	Butyricicoccus sp. KS-2	Bacteria	Butyricicoccus faecihominis strain KS-2 16S ribosomal RNA, partial sequence
192406	0.00140654	0.00168463	100	94.1176	-0.258601	0.972891	0.476232	-0.189744	0.130235		0.603967	0.00925575	*	0.284687	0.272387		0.401574	0.0851281	#	192406_Ruminococcaceae		Ruminococcaceae	Clostridiales	Clostridia	Firmicutes	Bacteria	192406	gi|1277396271|ref|NR_151982.1|	99.605	3.29e-130	1628085	Eubacterium sp. SR79	Eubacterium sp. SR79	Bacteria	Agathobaculum butyriciproducens strain SR79 16S ribosomal RNA, partial sequence
1820513	2.67023e-05	2.59933e-05	58.8235	58.8235	0.0281422	0.655353	0.383109	-0.298985	0.070011	#	0.618801	0.00789582	*	0.101529	0.476751		0.157217	0.299583		1820513_Sutterella	Sutterella	Alcaligenaceae	Burkholderiales	Betaproteobacteria	Proteobacteria	Bacteria	1820513	gi|645320614|ref|NR_117778.1|	100	7.07e-132	40545	Sutterella wadsworthensis	Sutterella wadsworthensis	Bacteria	Sutterella wadsworthensis strain WAL 9799 16S ribosomal RNA gene, partial sequence
																												gi|559795260|ref|NR_104851.1|	100	7.07e-132	40545	Sutterella wadsworthensis	Sutterella wadsworthensis	Bacteria	Sutterella wadsworthensis strain WAL 9799 16S ribosomal RNA gene, partial sequence
3903651	5.41991e-05	0.00059125	94.1176	94.1176	-3.22734	0.0604748	0.132811	-0.517011	0.00772718	*	0.456986	0.0421667	*	0.105876	0.475853		0.264454	0.186678		3903651_Oscillospira	Oscillospira	Ruminococcaceae	Clostridiales	Clostridia	Firmicutes	Bacteria	3903651	gi|343198636|ref|NR_043142.1|	100	7.07e-132	292800	Flavonifractor plautii	Flavonifractor plautii	Bacteria	Flavonifractor plautii strain Prevot S1 16S ribosomal RNA gene, partial sequence
																												gi|265679048|ref|NR_029356.1|	100	7.07e-132	292800	Flavonifractor plautii	Flavonifractor plautii	Bacteria	Flavonifractor plautii strain 265 16S ribosomal RNA gene, partial sequence
4473509	0.000379394	0.000836885	100	94.1176	-1.12094	0.32228	0.272787	-0.642393	0.00104456	*	0.477428	0.0345981	*	0.153478	0.437935		0.285617	0.163747		4473509_Lachnospiraceae		Lachnospiraceae	Clostridiales	Clostridia	Firmicutes	Bacteria	4473509	gi|636559154|ref|NR_115211.1|	96.047	3.36e-115	253257	Clostridium amygdalinum	Clostridium amygdalinum	Bacteria	[Clostridium] amygdalinum strain BR-10 16S ribosomal RNA gene, partial sequence
																												gi|219857286|ref|NR_024917.1|	96.047	3.36e-115	1286820	Clostridium methoxybenzovorans SR3	Clostridium methoxybenzovorans SR3	Bacteria	[Clostridium] methoxybenzovorans strain SR3 16S ribosomal RNA gene, partial sequence
195937	0.00707003	0.0137166	100	100	-0.955147	0.0850826	0.147097	-0.52547	0.00754847	*	0.311218	0.139842		0.19219	0.38061		0.298615	0.15863		195937_Blautia	Blautia	Lachnospiraceae	Clostridiales	Clostridia	Firmicutes	Bacteria	195937	gi|343201234|ref|NR_041960.1|	99.606	3.29e-130	89014	Blautia luti	Blautia luti	Bacteria	Blautia luti strain BInIX 16S ribosomal RNA, partial sequence
2724175	0	0.000607827	47.0588	88.2353	-5.94913	0.000677241	0.0133558	-0.669955	0.000430783	*	0.515822	0.0257021	*	0.406858	0.152472		0.528834	0.0292319	*	2724175_Lachnospiraceae		Lachnospiraceae	Clostridiales	Clostridia	Firmicutes	Bacteria	2724175	gi|310974936|ref|NR_036800.1|	100	7.07e-132	411470	Ruminococcus gnavus ATCC 29149	Ruminococcus gnavus ATCC 29149	Bacteria	[Ruminococcus] gnavus strain ATCC 29149 16S ribosomal RNA gene, partial sequence
																												gi|645321810|ref|NR_118690.1|	100	7.07e-132	33038	[Ruminococcus] gnavus	[Ruminococcus] gnavus	Bacteria	[Ruminococcus] gnavus strain ATCC 29149 16S ribosomal RNA, partial sequence
4483337	0.000819714	0.00195726	88.2353	94.1176	-1.2455	0.0580959	0.131131	-0.272479	0.0829304	#	0.274966	0.175253		0.620419	0.0234189	*	0.535317	0.0292319	*	4483337_Lachnospiraceae		Lachnospiraceae	Clostridiales	Clostridia	Firmicutes	Bacteria	4483337	gi|1441204227|ref|NR_157642.1|	95.652	1.56e-113	1653435	Clostridium sp. BR31	Clostridium sp. BR31	Bacteria	Merdimonas faecis strain BR31 16S ribosomal RNA, partial sequence
																												gi|1397641798|ref|NR_156907.1|	95.652	1.56e-113	1912855	Ruminococcus sp. JCM 30896	Ruminococcus sp. JCM 30896	Bacteria	Faecalimonas umbilicata strain EGH7 16S ribosomal RNA, partial sequence
																												gi|310975204|ref|NR_037068.1|	95.652	1.56e-113	29375	Clostridium xylanolyticum	Clostridium xylanolyticum	Bacteria	[Clostridium] xylanolyticum strain DSM 6555 16S ribosomal RNA gene, partial sequence
																												gi|219846508|ref|NR_026100.1|	95.652	1.56e-113	1286362	Clostridium celerecrescens 18A	Clostridium celerecrescens 18A	Bacteria	[Clostridium] celerecrescens strain 18A 16S ribosomal RNA gene, partial sequence
																												gi|631251457|ref|NR_112654.1|	95.652	1.56e-113	1286362	Clostridium celerecrescens 18A	Clostridium celerecrescens 18A	Bacteria	[Clostridium] celerecrescens strain 18A 16S ribosomal RNA gene, partial sequence
																												gi|631250977|ref|NR_112174.1|	95.652	1.56e-113	1297793	Clostridium sphenoides JCM 1415	Clostridium sphenoides JCM 1415	Bacteria	[Clostridium] sphenoides strain ATCC 19403 16S ribosomal RNA gene, partial sequence
																												gi|265678424|ref|NR_028726.1|	95.652	1.56e-113	94868	Clostridium algidixylanolyticum	Clostridium algidixylanolyticum	Bacteria	[Clostridium] algidixylanolyticum strain SPL73 16S ribosomal RNA gene, partial sequence
																												gi|219846817|ref|NR_026409.1|	95.652	1.56e-113	58134	Desulfotomaculum guttoideum	Desulfotomaculum guttoideum	Bacteria	[Desulfotomaculum] guttoideum strain DSM 4024 16S ribosomal RNA gene, partial sequence
173876	0.000224573	0	76.4706	23.5294	4.55197	0.0015451	0.020925	0.63757	0.000943377	*	-0.0142543	0.425793		-0.104711	0.475853		-0.197766	0.269908		173876_Clostridiales			Clostridiales	Clostridia	Firmicutes	Bacteria	173876	gi|636559633|ref|NR_115693.1|	87.402	1.64e-78	694434	Gracilibacter thermotolerans JW/YJL-S1	Gracilibacter thermotolerans JW/YJL-S1	Bacteria	Gracilibacter thermotolerans strain JW/YJL-S1 16S ribosomal RNA gene, partial sequence
																												gi|636559632|ref|NR_115692.1|	87.402	1.64e-78	694434	Gracilibacter thermotolerans JW/YJL-S1	Gracilibacter thermotolerans JW/YJL-S1	Bacteria	Gracilibacter thermotolerans strain JW/YJL-S1 16S ribosomal RNA gene, partial sequence
																												gi|636559631|ref|NR_115691.1|	87.402	1.64e-78	694434	Gracilibacter thermotolerans JW/YJL-S1	Gracilibacter thermotolerans JW/YJL-S1	Bacteria	Gracilibacter thermotolerans strain JW/YJL-S1 16S ribosomal RNA gene, partial sequence
																												gi|636559630|ref|NR_115690.1|	87.402	1.64e-78	694434	Gracilibacter thermotolerans JW/YJL-S1	Gracilibacter thermotolerans JW/YJL-S1	Bacteria	Gracilibacter thermotolerans strain JW/YJL-S1 16S ribosomal RNA gene, partial sequence
																												gi|343198739|ref|NR_043559.1|	87.402	1.64e-78	694434	Gracilibacter thermotolerans JW/YJL-S1	Gracilibacter thermotolerans JW/YJL-S1	Bacteria	Gracilibacter thermotolerans strain JW/YJL-S1 16S ribosomal RNA gene, partial sequence
173810	0	0	41.1765	17.6471	0	0.113551	0.162404	0.519665	0.00754847	*	-0.198235	0.247298		-0.0626306	0.508964		-0.19555	0.269908		173810_Ruminococcaceae		Ruminococcaceae	Clostridiales	Clostridia	Firmicutes	Bacteria	173810	gi|507148077|ref|NR_102884.1|	94.862	3.38e-110	1161942	Ruminococcus champanellensis	Ruminococcus champanellensis	Bacteria	Ruminococcus champanellensis strain 18P13 16S ribosomal RNA, partial sequence
																												gi|636558832|ref|NR_114889.1|	94.862	3.38e-110	213810	Ruminococcus champanellensis 18P13	Ruminococcus champanellensis 18P13	Bacteria	Ruminococcus champanellensis strain 18P13 16S ribosomal RNA gene, partial sequence
178242	0.000595204	0	88.2353	11.7647	5.91935	1.39814e-05	0.00113609	0.562151	0.00408113	*	-0.0725724	0.383292		-0.282586	0.272387		-0.318815	0.147658		178242_Ruminococcaceae		Ruminococcaceae	Clostridiales	Clostridia	Firmicutes	Bacteria	178242	gi|343206380|ref|NR_044972.1|	94.488	1.57e-108	44749	Sporobacter termitidis	Sporobacter termitidis	Bacteria	Sporobacter termitidis strain SYR 16S ribosomal RNA, partial sequence
186732	0.00536329	0.00279591	100	100	0.937334	0.0674878	0.140612	0.611624	0.00177379	*	-0.105677	0.348906		-0.355602	0.186336		-0.275697	0.177489		186732_Ruminococcaceae		Ruminococcaceae	Clostridiales	Clostridia	Firmicutes	Bacteria	186732	gi|566085203|ref|NR_109014.1|	100	7.07e-132	871665	Blautia sp. M25	Blautia sp. M25	Bacteria	Blautia faecis strain M25 16S ribosomal RNA gene, partial sequence
181059	0.00417233	9.26286e-06	94.1176	52.9412	7.76234	0.000262048	0.0106467	0.716292	0.000166798	*	-0.169206	0.275633		-0.218616	0.354305		-0.330527	0.140203		181059_Clostridiales			Clostridiales	Clostridia	Firmicutes	Bacteria	181059	gi|636559633|ref|NR_115693.1|	87.008	7.64e-77	694434	Gracilibacter thermotolerans JW/YJL-S1	Gracilibacter thermotolerans JW/YJL-S1	Bacteria	Gracilibacter thermotolerans strain JW/YJL-S1 16S ribosomal RNA gene, partial sequence
																												gi|636559632|ref|NR_115692.1|	87.008	7.64e-77	694434	Gracilibacter thermotolerans JW/YJL-S1	Gracilibacter thermotolerans JW/YJL-S1	Bacteria	Gracilibacter thermotolerans strain JW/YJL-S1 16S ribosomal RNA gene, partial sequence
																												gi|636559631|ref|NR_115691.1|	87.008	7.64e-77	694434	Gracilibacter thermotolerans JW/YJL-S1	Gracilibacter thermotolerans JW/YJL-S1	Bacteria	Gracilibacter thermotolerans strain JW/YJL-S1 16S ribosomal RNA gene, partial sequence
																												gi|636559630|ref|NR_115690.1|	87.008	7.64e-77	694434	Gracilibacter thermotolerans JW/YJL-S1	Gracilibacter thermotolerans JW/YJL-S1	Bacteria	Gracilibacter thermotolerans strain JW/YJL-S1 16S ribosomal RNA gene, partial sequence
																												gi|343198739|ref|NR_043559.1|	87.008	7.64e-77	694434	Gracilibacter thermotolerans JW/YJL-S1	Gracilibacter thermotolerans JW/YJL-S1	Bacteria	Gracilibacter thermotolerans strain JW/YJL-S1 16S ribosomal RNA gene, partial sequence
185575	0.00781792	0.00263832	100	100	1.56355	0.474458	0.332355	0.552821	0.00537122	*	-0.256156	0.188357		-0.185338	0.394213		-0.291774	0.15863		185575_Ruminococcaceae		Ruminococcaceae	Clostridiales	Clostridia	Firmicutes	Bacteria	185575	gi|265678656|ref|NR_028961.1|	95.652	1.56e-113	853	Faecalibacterium prausnitzii	Faecalibacterium prausnitzii	Bacteria	Faecalibacterium prausnitzii strain ATCC 27768 16S ribosomal RNA gene, partial sequence
1751298	0.00182916	5.28989e-05	94.1176	82.3529	4.86987	0.0044584	0.0258769	0.630517	0.00104456	*	-0.293292	0.162542		-0.234145	0.322435		-0.317303	0.147658		1751298_Roseburia	Roseburia	Lachnospiraceae	Clostridiales	Clostridia	Firmicutes	Bacteria	1751298	gi|444439494|ref|NR_074809.1|	100	7.07e-132	301301	Roseburia hominis	Roseburia hominis	Bacteria	Roseburia hominis strain A2-183 16S ribosomal RNA, partial sequence
																												gi|343201282|ref|NR_042008.1|	100	7.07e-132	301301	Roseburia hominis	Roseburia hominis	Bacteria	Roseburia hominis strain A2-183 16S ribosomal RNA, partial sequence
4301511	0.00159565	0	94.1176	47.0588	7.32701	0.00934923	0.0422051	0.624603	0.00116469	*	-0.172547	0.271834		-0.349133	0.195855		-0.416558	0.0794577	#	4301511_Clostridiales			Clostridiales	Clostridia	Firmicutes	Bacteria	4301511	gi|1179766720|ref|NR_146670.1|	88.189	7.59e-82	1380685	Kroppenstedtia sp. W9323	Kroppenstedtia sp. W9323	Bacteria	Kroppenstedtia pulmonis strain W9323 16S ribosomal RNA, partial sequence
323135	0.00108269	0	76.4706	29.4118	6.77174	0.00790402	0.0377799	0.503049	0.00970697	*	-0.243609	0.203971		-0.407186	0.152472		-0.415095	0.0794577	#	323135_Ruminococcus	Ruminococcus	Ruminococcaceae	Clostridiales	Clostridia	Firmicutes	Bacteria	323135	gi|265678854|ref|NR_029160.1|	96.047	3.36e-115	40519	Ruminococcus callidus	Ruminococcus callidus	Bacteria	Ruminococcus callidus strain ATCC 27760 16S ribosomal RNA gene, partial sequence
16054	8.96562e-05	0	82.3529	47.0588	3.31696	0.081251	0.147097	0.540949	0.00573449	*	-0.265814	0.183192		-0.317408	0.239979		-0.394388	0.0887823	#	16054_Ruminococcus	Ruminococcus	Ruminococcaceae	Clostridiales	Clostridia	Firmicutes	Bacteria	16054	gi|265678854|ref|NR_029160.1|	99.605	3.29e-130	40519	Ruminococcus callidus	Ruminococcus callidus	Bacteria	Ruminococcus callidus strain ATCC 27760 16S ribosomal RNA gene, partial sequence
183439	0.000661899	0	82.3529	47.0588	6.07017	0.350627	0.284909	0.537291	0.00573449	*	-0.213733	0.233697		-0.33829	0.210931		-0.431031	0.0721401	#	183439_Ruminococcaceae		Ruminococcaceae	Clostridiales	Clostridia	Firmicutes	Bacteria	183439	gi|631252162|ref|NR_113360.1|	92.885	7.38e-102	1121303	Clostridium cellobioparum DSM 1351 = ATCC 15832	Clostridium cellobioparum DSM 1351 = ATCC 15832	Bacteria	[Clostridium] cellobioparum strain JCM 1422 16S ribosomal RNA gene, partial sequence
																												gi|645319736|ref|NR_117111.1|	92.885	7.38e-102	29371	Clostridium termitidis	Clostridium termitidis	Bacteria	[Clostridium] termitidis strain DSM 5398 16S ribosomal RNA gene, partial sequence
260414	0.000682306	7.39062e-05	94.1176	52.9412	3.04456	0.00669658	0.0340091	0.536787	0.00573449	*	-0.475159	0.0347143	*	-0.0996224	0.478045		-0.234512	0.222124		260414_Ruminococcaceae		Ruminococcaceae	Clostridiales	Clostridia	Firmicutes	Bacteria	260414	gi|645321110|ref|NR_118156.1|	94.488	1.57e-108	1007096	Oscillibacter ruminantium GH1	Oscillibacter ruminantium GH1	Bacteria	Oscillibacter ruminantium strain GH1 16S ribosomal RNA gene, partial sequence
4480861	0	2.59933e-05	41.1765	58.8235	-1.84773	0.796635	0.428691	0.129706	0.170339		-0.551531	0.0182658	*	-0.216378	0.354305		-0.288059	0.162173		4480861_Catenibacterium	Catenibacterium	Erysipelotrichaceae	Erysipelotrichales	Erysipelotrichi	Firmicutes	Bacteria	4480861	gi|228715354|ref|NR_027526.1|	97.166	2.59e-116	100886	Catenibacterium mitsuokai	Catenibacterium mitsuokai	Bacteria	Catenibacterium mitsuokai strain DSM 15897 16S ribosomal RNA gene, partial sequence
3327894	0.00406595	0.00012968	94.1176	94.1176	4.86694	0.00617258	0.0334378	0.314242	0.0619819	#	-0.541132	0.0186345	*	-0.41888	0.152472		-0.41105	0.0815271	#	3327894_Bacteroides	Bacteroides	Bacteroidaceae	Bacteroidales	Bacteroidia	Bacteroidetes	Bacteria	3327894	gi|631251747|ref|NR_112945.1|	99.605	3.29e-130	820	Bacteroides uniformis	Bacteroides uniformis	Bacteria	Bacteroides uniformis strain JCM 5828 16S ribosomal RNA gene, partial sequence
																												gi|343200179|ref|NR_040866.1|	99.605	3.29e-130	820	Bacteroides uniformis	Bacteroides uniformis	Bacteria	Bacteroides uniformis strain JCM 5828 16S ribosomal RNA gene, partial sequence
4295707	0	4.77578e-05	41.1765	70.5882	-2.53002	0.296232	0.27046	0.324147	0.0585289	#	-0.631264	0.00666465	*	-0.252339	0.305173		-0.404247	0.0851281	#	4295707_[Eubacterium]	[Eubacterium]	Erysipelotrichaceae	Erysipelotrichales	Erysipelotrichi	Firmicutes	Bacteria	4295707	gi|602269354|ref|NR_044731.2|	97.628	7.17e-122	1735	[Eubacterium] biforme	[Eubacterium] biforme	Bacteria	Holdemanella biformis strain DSM 3989 16S ribosomal RNA, partial sequence
316732	0.00540499	1.85257e-05	94.1176	52.9412	7.56855	0.00312756	0.0258769	0.446096	0.0187101	*	-0.551187	0.0182658	*	-0.235053	0.322435		-0.349111	0.125673		316732_Lachnospira	Lachnospira	Lachnospiraceae	Clostridiales	Clostridia	Firmicutes	Bacteria	316732	gi|444304189|ref|NR_074613.1|	99.605	3.29e-130	39485	Eubacterium eligens	Eubacterium eligens	Bacteria	[Eubacterium] eligens strain ATCC 27750 16S ribosomal RNA, partial sequence
4410166	6.21292e-05	1.2387e-05	70.5882	70.5882	1.68792	0.68828	0.396651	0.34134	0.0502819	#	-0.591629	0.00972786	*	-0.203163	0.371499		-0.331561	0.140203		4410166_Prevotella	Prevotella	Prevotellaceae	Bacteroidales	Bacteroidia	Bacteroidetes	Bacteria	4410166	gi|631252213|ref|NR_113411.1|	99.209	1.53e-128	537011	Prevotella copri DSM 18205	Prevotella copri DSM 18205	Bacteria	Prevotella copri strain JCM 13464 16S ribosomal RNA gene, partial sequence
																												gi|343200190|ref|NR_040877.1|	99.209	1.53e-128	537011	Prevotella copri DSM 18205	Prevotella copri DSM 18205	Bacteria	Prevotella copri strain CB7 16S ribosomal RNA gene, partial sequence
230578	0	0	41.1765	23.5294	0	0.384141	0.295446	0.339507	0.0506869	#	-0.535003	0.0198552	*	-0.273533	0.277021		-0.332653	0.140203		230578_Coriobacteriaceae		Coriobacteriaceae	Coriobacteriales	Coriobacteriia	Actinobacteria	Bacteria	230578	gi|1109168021|ref|NR_144609.1|	94.841	1.21e-109	1796610	Asaccharobacter sp. WCA-131-CoC-2	Asaccharobacter sp. WCA-131-CoC-2	Bacteria	Enterorhabdus muris strain WCA-131-CoC-2 16S ribosomal RNA, partial sequence
4438983	0.000365812	0	70.5882	29.4118	5.23194	0.0136404	0.0538351	0.781058	2.25249e-05	*	-0.736871	0.00129555	*	-0.635893	0.0234189	*	-0.739132	0.000927161	*	4438983_Methanobrevibacter	Methanobrevibacter	Methanobacteriaceae	Methanobacteriales	Methanobacteria	Euryarchaeota	Archaea	4438983	gi|444303813|ref|NR_074235.1|	100	1.97e-132	420247	Methanobrevibacter smithii ATCC 35061	Methanobrevibacter smithii ATCC 35061	Archaea	Methanobrevibacter smithii strain PS 16S ribosomal RNA gene, complete sequence
																												gi|636559112|ref|NR_115169.1|	100	1.97e-132	420247	Methanobrevibacter smithii ATCC 35061	Methanobrevibacter smithii ATCC 35061	Archaea	Methanobrevibacter smithii strain PS 16S ribosomal RNA gene, partial sequence
																												gi|343206194|ref|NR_044786.1|	100	1.97e-132	420247	Methanobrevibacter smithii ATCC 35061	Methanobrevibacter smithii ATCC 35061	Archaea	Methanobrevibacter smithii strain PS 16S ribosomal RNA gene, complete sequence
176318	0.000107807	0	94.1176	47.0588	3.55835	0.00319968	0.0258769	0.828218	7.96038e-06	*	-0.545166	0.0182658	*	-0.501124	0.0633893	#	-0.572101	0.0188284	*	176318_Christensenellaceae		Christensenellaceae	Clostridiales	Clostridia	Firmicutes	Bacteria	176318	gi|1116030284|ref|NR_144742.1|	90.551	7.51e-92	1805714	Christensenella sp. Marseille-P2438	Christensenella sp. Marseille-P2438	Bacteria	Christensenella massiliensis strain Marseille-P2438 16S ribosomal RNA, partial sequence
4468466	0.0018582	1.22332e-05	100	52.9412	6.39279	0.0152381	0.0538351	0.808269	8.88525e-06	*	-0.690876	0.00171569	*	-0.536796	0.0415569	*	-0.608234	0.0106693	*	4468466_Ruminococcaceae		Ruminococcaceae	Clostridiales	Clostridia	Firmicutes	Bacteria	4468466	gi|343206380|ref|NR_044972.1|	93.307	1.59e-103	44749	Sporobacter termitidis	Sporobacter termitidis	Bacteria	Sporobacter termitidis strain SYR 16S ribosomal RNA, partial sequence
4300690	0.0010493	0	76.4706	41.1765	6.72697	0.0455441	0.11565	0.812304	8.88525e-06	*	-0.484979	0.0345981	*	-0.621061	0.0234189	*	-0.728209	0.000927161	*	4300690_Ruminococcaceae		Ruminococcaceae	Clostridiales	Clostridia	Firmicutes	Bacteria	4300690	gi|559795314|ref|NR_104907.1|	91.304	1.24e-94	290054	Eubacterium coprostanoligenes	Eubacterium coprostanoligenes	Bacteria	Eubacterium coprostanoligenes strain HL 16S ribosomal RNA gene, partial sequence
185802	7.85758e-05	0	76.4706	47.0588	3.14691	0.0433561	0.11565	0.675063	0.000411492	*	-0.560258	0.017853	*	-0.594937	0.0328004	*	-0.701961	0.00160559	*	185802_Ruminococcaceae		Ruminococcaceae	Clostridiales	Clostridia	Firmicutes	Bacteria	185802	gi|559795314|ref|NR_104907.1|	93.676	3.41e-105	290054	Eubacterium coprostanoligenes	Eubacterium coprostanoligenes	Bacteria	Eubacterium coprostanoligenes strain HL 16S ribosomal RNA gene, partial sequence
4412540	0.00432611	0	94.1176	41.1765	8.76026	0.00181878	0.0211127	0.702074	0.000222457	*	-0.518266	0.0257021	*	-0.554838	0.0356025	*	-0.608823	0.0106693	*	4412540_Ruminococcaceae		Ruminococcaceae	Clostridiales	Clostridia	Firmicutes	Bacteria	4412540	gi|1269801610|ref|NR_074793.2|	94.094	7.32e-107	351091	Oscillibacter valericigenes	Oscillibacter valericigenes	Bacteria	Oscillibacter valericigenes strain Sjm18-20 16S ribosomal RNA, complete sequence
																												gi|343200653|ref|NR_041340.1|	94.094	7.32e-107	351091	Oscillibacter valericigenes	Oscillibacter valericigenes	Bacteria	Oscillibacter valericigenes strain Sjm18-20 16S ribosomal RNA gene, partial sequence
4409280	0.00484178	2.74948e-05	100	70.5882	7.01568	0.0297603	0.0930093	0.670202	0.000430783	*	-0.487337	0.0345981	*	-0.574221	0.0350284	*	-0.617149	0.0106693	*	4409280_Ruminococcaceae		Ruminococcaceae	Clostridiales	Clostridia	Firmicutes	Bacteria	4409280	gi|219846512|ref|NR_026104.1|	90.909	1.61e-93	1121303	Clostridium cellobioparum DSM 1351 = ATCC 15832	Clostridium cellobioparum DSM 1351 = ATCC 15832	Bacteria	[Clostridium] cellobioparum strain DSM 1351 16S ribosomal RNA gene, partial sequence
																												gi|219846080|ref|NR_025670.1|	90.909	1.61e-93	411467	Pseudoflavonifractor capillosus ATCC 29799	Pseudoflavonifractor capillosus ATCC 29799	Bacteria	Pseudoflavonifractor capillosus strain ATCC 29799 16S ribosomal RNA gene, partial sequence
2056702	0.000169149	0	64.7059	41.1765	4.16309	0.0872439	0.147692	0.416078	0.0232696	*	-0.282281	0.170541		-0.551645	0.0356025	*	-0.585186	0.0158199	*	2056702_Ruminococcaceae		Ruminococcaceae	Clostridiales	Clostridia	Firmicutes	Bacteria	2056702	gi|645321110|ref|NR_118156.1|	94.094	7.32e-107	1007096	Oscillibacter ruminantium GH1	Oscillibacter ruminantium GH1	Bacteria	Oscillibacter ruminantium strain GH1 16S ribosomal RNA gene, partial sequence
4397092	0.000393533	1.24522e-05	52.9412	52.9412	4.16776	0.827185	0.43646	0.316756	0.0618063	#	-0.386399	0.0803728	#	-0.465884	0.0995543	#	-0.525381	0.0292319	*	4397092_Coriobacteriaceae		Coriobacteriaceae	Coriobacteriales	Coriobacteriia	Actinobacteria	Bacteria	4397092	gi|672239006|ref|NR_125595.1|	100	2.53e-131	1034345	Coriobacteriaceae bacterium JC110	Coriobacteriaceae bacterium JC110	Bacteria	Senegalimassilia anaerobia strain JC110 16S ribosomal RNA gene, partial sequence
147969	9.34579e-05	1.48719e-05	94.1176	52.9412	2.05646	0.0821783	0.147097	0.548524	0.00524506	*	-0.512453	0.0260367	*	-0.549307	0.0356025	*	-0.535681	0.0292319	*	147969_Ruminococcus	Ruminococcus	Ruminococcaceae	Clostridiales	Clostridia	Firmicutes	Bacteria	147969	gi|645321791|ref|NR_118675.1|	98.419	1.98e-127	39492	Eubacterium siraeum	Eubacterium siraeum	Bacteria	[Eubacterium] siraeum strain ATCC 29066 16S ribosomal RNA gene, partial sequence
307238	0.000551024	1.22332e-05	94.1176	52.9412	4.65728	0.00221925	0.0225413	0.599317	0.00182937	*	-0.597807	0.00925575	*	-0.559987	0.0356025	*	-0.556721	0.0235261	*	307238_Oscillospira	Oscillospira	Ruminococcaceae	Clostridiales	Clostridia	Firmicutes	Bacteria	307238	gi|343206380|ref|NR_044972.1|	94.488	1.57e-108	44749	Sporobacter termitidis	Sporobacter termitidis	Bacteria	Sporobacter termitidis strain SYR 16S ribosomal RNA, partial sequence
2617854	0.000815441	0.000272929	88.2353	64.7059	1.54472	0.0522176	0.12462	0.603756	0.00176189	*	-0.408858	0.0651322	#	-0.574212	0.0350284	*	-0.60752	0.0106693	*	2617854_Rikenellaceae		Rikenellaceae	Bacteroidales	Bacteroidia	Bacteroidetes	Bacteria	2617854	gi|939733298|ref|NR_133025.1|	100	7.07e-132	1118061	Bacteroidales bacterium ph8	Bacteroidales bacterium ph8	Bacteria	Alistipes obesi strain ph8 16S ribosomal RNA, partial sequence
179400	0.00284468	0.0013236	100	76.4706	1.09801	0.0847993	0.147097	0.536777	0.00573449	*	-0.383984	0.0803728	#	-0.520055	0.0487497	*	-0.488448	0.0449604	*	179400_Clostridiales			Clostridiales	Clostridia	Firmicutes	Bacteria	179400	gi|636560687|ref|NR_116747.1|	100	7.07e-132	1298596	Ruminococcus faecis JCM 15917	Ruminococcus faecis JCM 15917	Bacteria	Ruminococcus faecis strain Eg2 16S ribosomal RNA gene, partial sequence
193666	0.000721704	0.000126506	100	94.1176	2.4223	0.0144949	0.0538351	0.479658	0.0138177	*	-0.449726	0.0457613	*	-0.5197	0.0487497	*	-0.486745	0.0449604	*	193666_Blautia	Blautia	Lachnospiraceae	Clostridiales	Clostridia	Firmicutes	Bacteria	193666	gi|343205678|ref|NR_044054.1|	99.605	3.29e-130	1121115	Blautia wexlerae DSM 19850	Blautia wexlerae DSM 19850	Bacteria	Blautia wexlerae strain DSM 19850 16S ribosomal RNA gene, partial sequence
176269	0.00380592	1.78773e-05	94.1176	58.8235	7.0968	0.00423636	0.0258769	0.714372	0.000166798	*	-0.679522	0.00197973	*	-0.28675	0.272387		-0.4434	0.0709992	#	176269_Lachnospira	Lachnospira	Lachnospiraceae	Clostridiales	Clostridia	Firmicutes	Bacteria	176269	gi|444304189|ref|NR_074613.1|	100	7.07e-132	39485	Eubacterium eligens	Eubacterium eligens	Bacteria	[Eubacterium] eligens strain ATCC 27750 16S ribosomal RNA, partial sequence
4437359	0.000449752	0.000105798	88.2353	52.9412	1.98925	0.0811061	0.147097	0.688245	0.000328453	*	-0.59843	0.00925575	*	-0.410355	0.152472		-0.527555	0.0292319	*	4437359_Oscillospira	Oscillospira	Ruminococcaceae	Clostridiales	Clostridia	Firmicutes	Bacteria	4437359	gi|645321110|ref|NR_118156.1|	92.885	7.38e-102	1007096	Oscillibacter ruminantium GH1	Oscillibacter ruminantium GH1	Bacteria	Oscillibacter ruminantium strain GH1 16S ribosomal RNA gene, partial sequence
819353	0.00184213	1.48719e-05	94.1176	58.8235	6.21852	0.000821825	0.0133558	0.77702	2.28505e-05	*	-0.482501	0.0345981	*	-0.403575	0.152921		-0.500774	0.0429617	*	819353_Ruminococcaceae		Ruminococcaceae	Clostridiales	Clostridia	Firmicutes	Bacteria	819353	gi|1109168025|ref|NR_144611.1|	93.281	1.59e-103	1417852	Lachnospiraceae bacterium BLS21	Lachnospiraceae bacterium BLS21	Bacteria	Flintibacter butyricus strain BLS21 16S ribosomal RNA, partial sequence
3275562	0.000774039	0.000610842	100	94.1176	0.3367	0.231307	0.245326	0.736068	0.000166798	*	-0.547538	0.0182658	*	-0.374444	0.167804		-0.453566	0.065045	#	3275562_Lachnospiraceae		Lachnospiraceae	Clostridiales	Clostridia	Firmicutes	Bacteria	3275562	gi|559795307|ref|NR_104899.1|	98.024	1.54e-123	384636	Bacteroides xylanolyticus	Bacteroides xylanolyticus	Bacteria	Bacteroides xylanolyticus strain X5-1 16S ribosomal RNA gene, partial sequence
4153054	0.000493583	0	76.4706	35.2941	5.65416	0.0366991	0.106502	0.773294	2.34009e-05	*	-0.406511	0.0657061	#	-0.324647	0.239263		-0.428237	0.0721401	#	4153054_Ruminococcaceae		Ruminococcaceae	Clostridiales	Clostridia	Firmicutes	Bacteria	4153054	gi|343206380|ref|NR_044972.1|	94.862	3.38e-110	44749	Sporobacter termitidis	Sporobacter termitidis	Bacteria	Sporobacter termitidis strain SYR 16S ribosomal RNA, partial sequence
4465124	0.000662711	0	82.3529	47.0588	6.07192	0.0644379	0.137791	0.783989	2.25249e-05	*	-0.412429	0.063511	#	-0.357518	0.186336		-0.479832	0.0468234	*	4465124_Clostridium	Clostridium	Clostridiaceae	Clostridiales	Clostridia	Firmicutes	Bacteria	4465124	gi|219846512|ref|NR_026104.1|	90.157	3.48e-90	1121303	Clostridium cellobioparum DSM 1351 = ATCC 15832	Clostridium cellobioparum DSM 1351 = ATCC 15832	Bacteria	[Clostridium] cellobioparum strain DSM 1351 16S ribosomal RNA gene, partial sequence
4405104	0.000530001	0	82.3529	35.2941	5.75489	0.0193452	0.0654974	0.603948	0.00176189	*	-0.342214	0.114277		-0.385298	0.16112		-0.361287	0.118632		4405104_Coprococcus	Coprococcus	Lachnospiraceae	Clostridiales	Clostridia	Firmicutes	Bacteria	4405104	gi|219878251|ref|NR_025390.1|	96.838	1.55e-118	115544	Parasporobacterium paucivorans	Parasporobacterium paucivorans	Bacteria	Parasporobacterium paucivorans strain SYR1 16S ribosomal RNA gene, partial sequence
174019	0.00128554	0	94.1176	41.1765	7.0174	0.000769348	0.0133558	0.684429	0.000346897	*	-0.326022	0.131285		-0.38133	0.16112		-0.436448	0.0721401	#	174019_Coprococcus	Coprococcus	Lachnospiraceae	Clostridiales	Clostridia	Firmicutes	Bacteria	174019	gi|219856842|ref|NR_024661.1|	96.838	1.55e-118	42322	Eubacterium ruminantium	Eubacterium ruminantium	Bacteria	Eubacterium ruminantium strain GA195 16S ribosomal RNA gene, partial sequence
2943548	0.00145288	0.000381849	100	64.7059	1.90044	0.00415054	0.0258769	0.623289	0.00116469	*	-0.315177	0.138076		-0.385381	0.16112		-0.429502	0.0721401	#	2943548_Ruminococcus	Ruminococcus	Ruminococcaceae	Clostridiales	Clostridia	Firmicutes	Bacteria	2943548	gi|1109168013|ref|NR_144605.1|	96.85	1.55e-118	1796620	Clostridiales bacterium KB18	Clostridiales bacterium KB18	Bacteria	Acutalibacter muris strain KB18 16S ribosomal RNA, partial sequence
4372528	0.000243353	6.19348e-05	88.2353	70.5882	1.81638	0.177311	0.216497	0.666782	0.000450509	*	-0.382837	0.0803728	#	-0.382636	0.16112		-0.485181	0.0449604	*	4372528_Clostridiales			Clostridiales	Clostridia	Firmicutes	Bacteria	4372528	gi|1040567059|ref|NR_137408.1|	99.603	1.18e-129	1460447	Clostridium sp. LAM0A37	Clostridium sp. LAM0A37	Bacteria	Terrisporobacter petrolearius strain LAM0A37 16S ribosomal RNA, partial sequence
1102370	1.45172e-05	0	52.9412	23.5294	1.29379	0.207523	0.234205	0.644	0.000828565	*	-0.425944	0.0587941	#	-0.397783	0.153649		-0.491716	0.0449604	*	1102370_Ruminococcaceae		Ruminococcaceae	Clostridiales	Clostridia	Firmicutes	Bacteria	1102370	gi|343206380|ref|NR_044972.1|	93.676	3.41e-105	44749	Sporobacter termitidis	Sporobacter termitidis	Bacteria	Sporobacter termitidis strain SYR 16S ribosomal RNA, partial sequence
4419459	0.00034713	0	76.4706	41.1765	5.15838	0.0124371	0.0531898	0.679266	0.000383339	*	-0.415445	0.0624135	#	-0.315997	0.239979		-0.426432	0.0721401	#	4419459_Clostridiales			Clostridiales	Clostridia	Firmicutes	Bacteria	4419459	gi|507148045|ref|NR_102852.1|	96.063	3.36e-115	84030	Clostridium saccharolyticum	Clostridium saccharolyticum	Bacteria	[Clostridium] saccharolyticum strain WM1 16S ribosomal RNA, partial sequence
																												gi|219846508|ref|NR_026100.1|	96.063	3.36e-115	1286362	Clostridium celerecrescens 18A	Clostridium celerecrescens 18A	Bacteria	[Clostridium] celerecrescens strain 18A 16S ribosomal RNA gene, partial sequence
																												gi|631251457|ref|NR_112654.1|	96.063	3.36e-115	1286362	Clostridium celerecrescens 18A	Clostridium celerecrescens 18A	Bacteria	[Clostridium] celerecrescens strain 18A 16S ribosomal RNA gene, partial sequence
																												gi|631250977|ref|NR_112174.1|	96.063	3.36e-115	1297793	Clostridium sphenoides JCM 1415	Clostridium sphenoides JCM 1415	Bacteria	[Clostridium] sphenoides strain ATCC 19403 16S ribosomal RNA gene, partial sequence
																												gi|219846902|ref|NR_026494.1|	96.063	3.36e-115	84030	Clostridium saccharolyticum	Clostridium saccharolyticum	Bacteria	[Clostridium] saccharolyticum strain WM1 16S ribosomal RNA gene, partial sequence
																												gi|219846817|ref|NR_026409.1|	96.063	3.36e-115	58134	Desulfotomaculum guttoideum	Desulfotomaculum guttoideum	Bacteria	[Desulfotomaculum] guttoideum strain DSM 4024 16S ribosomal RNA gene, partial sequence
176062	0.000694153	0	70.5882	47.0588	6.13782	0.158413	0.199807	0.712528	0.000166798	*	-0.424054	0.0587941	#	-0.373335	0.167804		-0.402781	0.0851281	#	176062_Clostridiales			Clostridiales	Clostridia	Firmicutes	Bacteria	176062	gi|1024974768|ref|NR_136797.1|	88.627	5.87e-83	1471761	Bacillales bacterium SG-1	Bacillales bacterium SG-1	Bacteria	Novibacillus thermophilus strain SG-1 16S ribosomal RNA, partial sequence
177037	0.000914011	0.00126929	94.1176	88.2353	-0.469355	0.581452	0.352591	0.713284	0.000166798	*	-0.42928	0.0584843	#	-0.360974	0.18434		-0.434143	0.0721401	#	177037_Blautia	Blautia	Lachnospiraceae	Clostridiales	Clostridia	Firmicutes	Bacteria	177037	gi|645321813|ref|NR_118692.1|	97.628	7.17e-122	40520	[Ruminococcus] obeum	[Ruminococcus] obeum	Bacteria	Blautia obeum strain ATCC 29174 16S ribosomal RNA, partial sequence

## Sheet: Supplementary Table 8
		Results wilcox rank sum test, PWC vs. OC (n=17+17)														Results BLAST of represented sequence of OTU
	otuid	median_Ob-PW	median_Ob	prevalence_Ob-PW	prevalence_Ob	log2FC_median	p.value	padj	otuid	L6	L5	L4	L3	L2	L1	OTU-id	Subject Seq-id	Percentage of identical matches	Expect value	Subject Taxonomy ID	Subject Scientific Name	Subject Common Name	Subject Super Kingdom	Subject Title
1	2724175	0	0.000607827	47.0588	88.2353	-5.94913	0.000677241	0.0133558	2724175_Lachnospiraceae		Lachnospiraceae	Clostridiales	Clostridia	Firmicutes	Bacteria	2724175	gi|310974936|ref|NR_036800.1|	100	7.07e-132	411470	Ruminococcus gnavus ATCC 29149	Ruminococcus gnavus ATCC 29149	Bacteria	[Ruminococcus] gnavus strain ATCC 29149 16S ribosomal RNA gene, partial sequence
2																	gi|645321810|ref|NR_118690.1|	100	7.07e-132	33038	[Ruminococcus] gnavus	[Ruminococcus] gnavus	Bacteria	[Ruminococcus] gnavus strain ATCC 29149 16S ribosomal RNA, partial sequence
3	2943548	0.00145288	0.000381849	100	64.7059	1.90044	0.00415054	0.0258769	2943548_Ruminococcus	Ruminococcus	Ruminococcaceae	Clostridiales	Clostridia	Firmicutes	Bacteria	2943548	gi|1109168013|ref|NR_144605.1|	96.85	1.55e-118	1796620	Clostridiales bacterium KB18	Clostridiales bacterium KB18	Bacteria	Acutalibacter muris strain KB18 16S ribosomal RNA, partial sequence
4	260414	0.000682306	7.39062e-05	94.1176	52.9412	3.04456	0.00669658	0.0340091	260414_Ruminococcaceae		Ruminococcaceae	Clostridiales	Clostridia	Firmicutes	Bacteria	260414	gi|645321110|ref|NR_118156.1|	94.488	1.57e-108	1007096	Oscillibacter ruminantium GH1	Oscillibacter ruminantium GH1	Bacteria	Oscillibacter ruminantium strain GH1 16S ribosomal RNA gene, partial sequence
5	4354235	0.00137453	0.000110859	100	64.7059	3.518	0.00371946	0.0258769	4354235_Lachnospiraceae		Lachnospiraceae	Clostridiales	Clostridia	Firmicutes	Bacteria	4354235	gi|559795307|ref|NR_104899.1|	98.419	3.31e-125	384636	Bacteroides xylanolyticus	Bacteroides xylanolyticus	Bacteria	Bacteroides xylanolyticus strain X5-1 16S ribosomal RNA gene, partial sequence
6	176318	0.000107807	0	94.1176	47.0588	3.55835	0.00319968	0.0258769	176318_Christensenellaceae		Christensenellaceae	Clostridiales	Clostridia	Firmicutes	Bacteria	176318	gi|1116030284|ref|NR_144742.1|	90.551	7.51e-92	1805714	Christensenella sp. Marseille-P2438	Christensenella sp. Marseille-P2438	Bacteria	Christensenella massiliensis strain Marseille-P2438 16S ribosomal RNA, partial sequence
7	173876	0.000224573	0	76.4706	23.5294	4.55197	0.0015451	0.020925	173876_Clostridiales			Clostridiales	Clostridia	Firmicutes	Bacteria	173876	gi|636559633|ref|NR_115693.1|	87.402	1.64e-78	694434	Gracilibacter thermotolerans JW/YJL-S1	Gracilibacter thermotolerans JW/YJL-S1	Bacteria	Gracilibacter thermotolerans strain JW/YJL-S1 16S ribosomal RNA gene, partial sequence
8																	gi|636559632|ref|NR_115692.1|	87.402	1.64e-78	694434	Gracilibacter thermotolerans JW/YJL-S1	Gracilibacter thermotolerans JW/YJL-S1	Bacteria	Gracilibacter thermotolerans strain JW/YJL-S1 16S ribosomal RNA gene, partial sequence
9																	gi|636559631|ref|NR_115691.1|	87.402	1.64e-78	694434	Gracilibacter thermotolerans JW/YJL-S1	Gracilibacter thermotolerans JW/YJL-S1	Bacteria	Gracilibacter thermotolerans strain JW/YJL-S1 16S ribosomal RNA gene, partial sequence
10																	gi|636559630|ref|NR_115690.1|	87.402	1.64e-78	694434	Gracilibacter thermotolerans JW/YJL-S1	Gracilibacter thermotolerans JW/YJL-S1	Bacteria	Gracilibacter thermotolerans strain JW/YJL-S1 16S ribosomal RNA gene, partial sequence
11																	gi|343198739|ref|NR_043559.1|	87.402	1.64e-78	694434	Gracilibacter thermotolerans JW/YJL-S1	Gracilibacter thermotolerans JW/YJL-S1	Bacteria	Gracilibacter thermotolerans strain JW/YJL-S1 16S ribosomal RNA gene, partial sequence
12	307238	0.000551024	1.22332e-05	94.1176	52.9412	4.65728	0.00221925	0.0225413	307238_Oscillospira	Oscillospira	Ruminococcaceae	Clostridiales	Clostridia	Firmicutes	Bacteria	307238	gi|343206380|ref|NR_044972.1|	94.488	1.57e-108	44749	Sporobacter termitidis	Sporobacter termitidis	Bacteria	Sporobacter termitidis strain SYR 16S ribosomal RNA, partial sequence
13	3327894	0.00406595	0.00012968	94.1176	94.1176	4.86694	0.00617258	0.0334378	3327894_Bacteroides	Bacteroides	Bacteroidaceae	Bacteroidales	Bacteroidia	Bacteroidetes	Bacteria	3327894	gi|631251747|ref|NR_112945.1|	99.605	3.29e-130	820	Bacteroides uniformis	Bacteroides uniformis	Bacteria	Bacteroides uniformis strain JCM 5828 16S ribosomal RNA gene, partial sequence
14																	gi|343200179|ref|NR_040866.1|	99.605	3.29e-130	820	Bacteroides uniformis	Bacteroides uniformis	Bacteria	Bacteroides uniformis strain JCM 5828 16S ribosomal RNA gene, partial sequence
15	1751298	0.00182916	5.28989e-05	94.1176	82.3529	4.86987	0.0044584	0.0258769	1751298_Roseburia	Roseburia	Lachnospiraceae	Clostridiales	Clostridia	Firmicutes	Bacteria	1751298	gi|444439494|ref|NR_074809.1|	100	7.07e-132	301301	Roseburia hominis	Roseburia hominis	Bacteria	Roseburia hominis strain A2-183 16S ribosomal RNA, partial sequence
16																	gi|343201282|ref|NR_042008.1|	100	7.07e-132	301301	Roseburia hominis	Roseburia hominis	Bacteria	Roseburia hominis strain A2-183 16S ribosomal RNA, partial sequence
17	178242	0.000595204	0	88.2353	11.7647	5.91935	1.39814e-05	0.00113609	178242_Ruminococcaceae		Ruminococcaceae	Clostridiales	Clostridia	Firmicutes	Bacteria	178242	gi|343206380|ref|NR_044972.1|	94.488	1.57e-108	44749	Sporobacter termitidis	Sporobacter termitidis	Bacteria	Sporobacter termitidis strain SYR 16S ribosomal RNA, partial sequence
18	819353	0.00184213	1.48719e-05	94.1176	58.8235	6.21852	0.000821825	0.0133558	819353_Ruminococcaceae		Ruminococcaceae	Clostridiales	Clostridia	Firmicutes	Bacteria	819353	gi|1109168025|ref|NR_144611.1|	93.281	1.59e-103	1417852	Lachnospiraceae bacterium BLS21	Lachnospiraceae bacterium BLS21	Bacteria	Flintibacter butyricus strain BLS21 16S ribosomal RNA, partial sequence
19	323135	0.00108269	0	76.4706	29.4118	6.77174	0.00790402	0.0377799	323135_Ruminococcus	Ruminococcus	Ruminococcaceae	Clostridiales	Clostridia	Firmicutes	Bacteria	323135	gi|265678854|ref|NR_029160.1|	96.047	3.36e-115	40519	Ruminococcus callidus	Ruminococcus callidus	Bacteria	Ruminococcus callidus strain ATCC 27760 16S ribosomal RNA gene, partial sequence
20	174019	0.00128554	0	94.1176	41.1765	7.0174	0.000769348	0.0133558	174019_Coprococcus	Coprococcus	Lachnospiraceae	Clostridiales	Clostridia	Firmicutes	Bacteria	174019	gi|219856842|ref|NR_024661.1|	96.838	1.55e-118	42322	Eubacterium ruminantium	Eubacterium ruminantium	Bacteria	Eubacterium ruminantium strain GA195 16S ribosomal RNA gene, partial sequence
21	176269	0.00380592	1.78773e-05	94.1176	58.8235	7.0968	0.00423636	0.0258769	176269_Lachnospira	Lachnospira	Lachnospiraceae	Clostridiales	Clostridia	Firmicutes	Bacteria	176269	gi|444304189|ref|NR_074613.1|	100	7.07e-132	39485	Eubacterium eligens	Eubacterium eligens	Bacteria	[Eubacterium] eligens strain ATCC 27750 16S ribosomal RNA, partial sequence
22	4301511	0.00159565	0	94.1176	47.0588	7.32701	0.00934923	0.0422051	4301511_Clostridiales			Clostridiales	Clostridia	Firmicutes	Bacteria	4301511	gi|1179766720|ref|NR_146670.1|	88.189	7.59e-82	1380685	Kroppenstedtia sp. W9323	Kroppenstedtia sp. W9323	Bacteria	Kroppenstedtia pulmonis strain W9323 16S ribosomal RNA, partial sequence
23	316732	0.00540499	1.85257e-05	94.1176	52.9412	7.56855	0.00312756	0.0258769	316732_Lachnospira	Lachnospira	Lachnospiraceae	Clostridiales	Clostridia	Firmicutes	Bacteria	316732	gi|444304189|ref|NR_074613.1|	99.605	3.29e-130	39485	Eubacterium eligens	Eubacterium eligens	Bacteria	[Eubacterium] eligens strain ATCC 27750 16S ribosomal RNA, partial sequence
24	181059	0.00417233	9.26286e-06	94.1176	52.9412	7.76234	0.000262048	0.0106467	181059_Clostridiales			Clostridiales	Clostridia	Firmicutes	Bacteria	181059	gi|636559633|ref|NR_115693.1|	87.008	7.64e-77	694434	Gracilibacter thermotolerans JW/YJL-S1	Gracilibacter thermotolerans JW/YJL-S1	Bacteria	Gracilibacter thermotolerans strain JW/YJL-S1 16S ribosomal RNA gene, partial sequence
25																	gi|636559632|ref|NR_115692.1|	87.008	7.64e-77	694434	Gracilibacter thermotolerans JW/YJL-S1	Gracilibacter thermotolerans JW/YJL-S1	Bacteria	Gracilibacter thermotolerans strain JW/YJL-S1 16S ribosomal RNA gene, partial sequence
26																	gi|636559631|ref|NR_115691.1|	87.008	7.64e-77	694434	Gracilibacter thermotolerans JW/YJL-S1	Gracilibacter thermotolerans JW/YJL-S1	Bacteria	Gracilibacter thermotolerans strain JW/YJL-S1 16S ribosomal RNA gene, partial sequence
27																	gi|636559630|ref|NR_115690.1|	87.008	7.64e-77	694434	Gracilibacter thermotolerans JW/YJL-S1	Gracilibacter thermotolerans JW/YJL-S1	Bacteria	Gracilibacter thermotolerans strain JW/YJL-S1 16S ribosomal RNA gene, partial sequence
28																	gi|343198739|ref|NR_043559.1|	87.008	7.64e-77	694434	Gracilibacter thermotolerans JW/YJL-S1	Gracilibacter thermotolerans JW/YJL-S1	Bacteria	Gracilibacter thermotolerans strain JW/YJL-S1 16S ribosomal RNA gene, partial sequence
29	4412540	0.00432611	0	94.1176	41.1765	8.76026	0.00181878	0.0211127	4412540_Ruminococcaceae		Ruminococcaceae	Clostridiales	Clostridia	Firmicutes	Bacteria	4412540	gi|1269801610|ref|NR_074793.2|	94.094	7.32e-107	351091	Oscillibacter valericigenes	Oscillibacter valericigenes	Bacteria	Oscillibacter valericigenes strain Sjm18-20 16S ribosomal RNA, complete sequence
30																	gi|343200653|ref|NR_041340.1|	94.094	7.32e-107	351091	Oscillibacter valericigenes	Oscillibacter valericigenes	Bacteria	Oscillibacter valericigenes strain Sjm18-20 16S ribosomal RNA gene, partial sequence

## Sheet: Supplementary Table 9
adonis, 9999 permutations
		unweighted unifrac
		R2	P	significans level	n
	genotype	0.09552	0.0257	*	12(deletion), 5(disomy)
	PD	0.15253	0.0001	***	12(deletion), 5(disomy)
	TG	0.1143	0.003	**	12(deletion), 5(disomy)
	insulin	0.10638	0.0672	.	9(deletion), 5(disomy)
	genotype+TG				12(deletion), 5(disomy)
	genotype	0.09552	0.0196	*
	TG	0.08451	0.0534	.
	TG+genotype				12(deletion), 5(disomy)
	TG	0.1143	0.0038	***
	genotype	0.0657	0.2626
	TG+PD+genotype				12(deletion), 5(disomy)
	TG	0.1143	0.0013	**
	PD	0.11413	0.0011	**
	genoptype	0.06576	0.1717

[truncated: 1 more sheets: Supplementary Table 10]
