# Supplementary material
Source: HighWire-hosted journal article supplement (https://gut.bmj.com/content/69/7/1229)
Supplement: inline-supplementary-material-2 [file inline-supplementary-material-2.pdf]

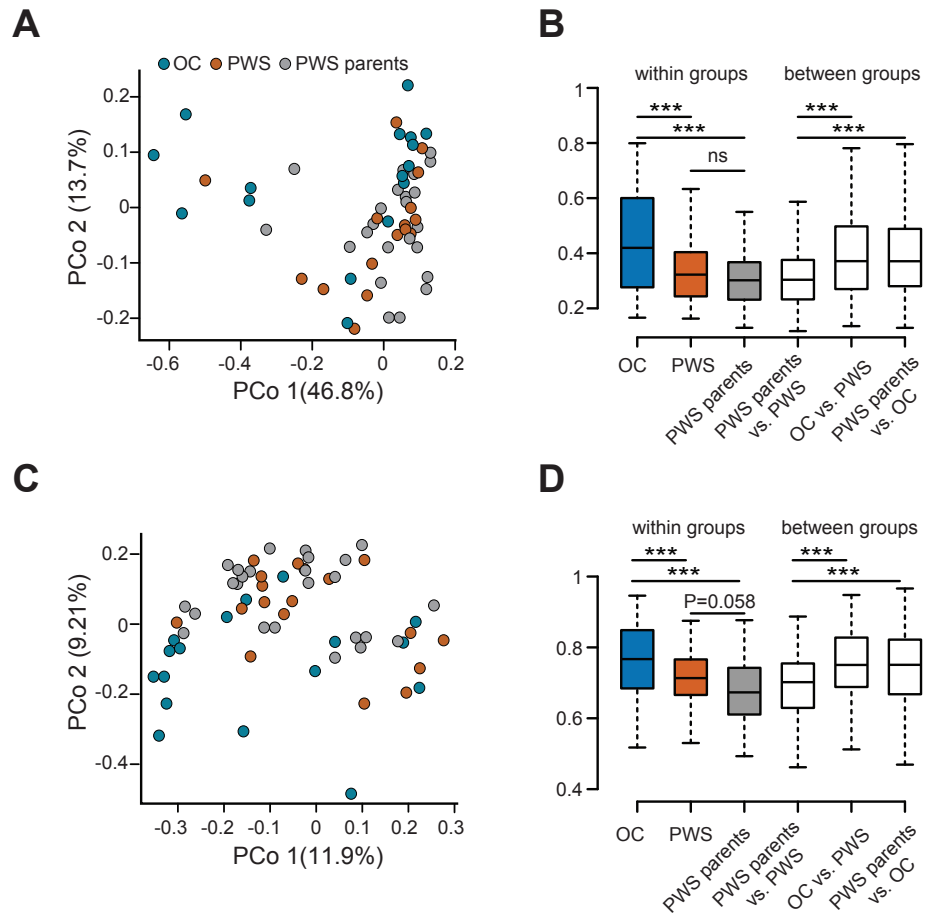

Supplementary Figure 1

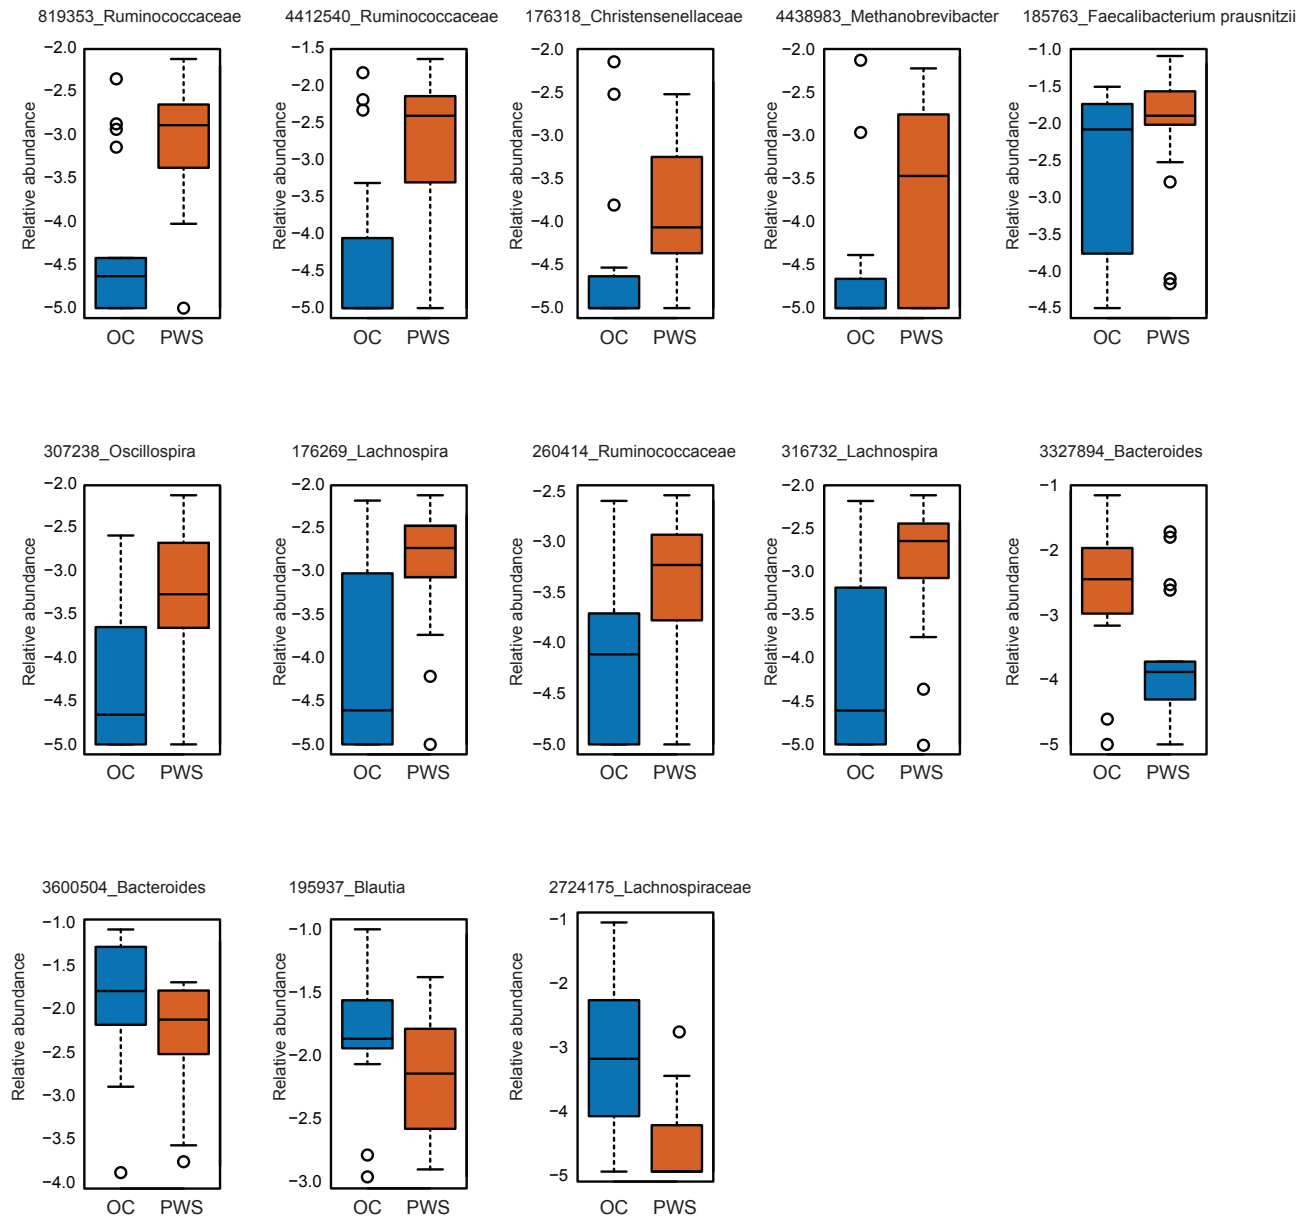

Supplementary Figure 2

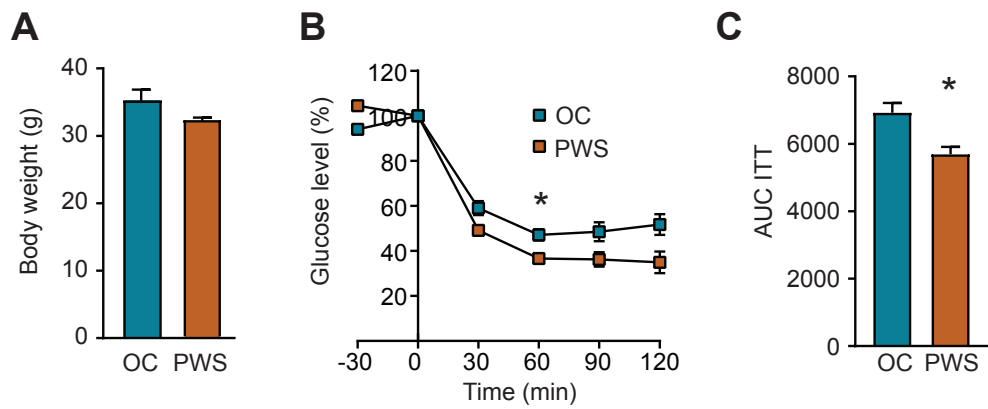

Supplementary Figure 3

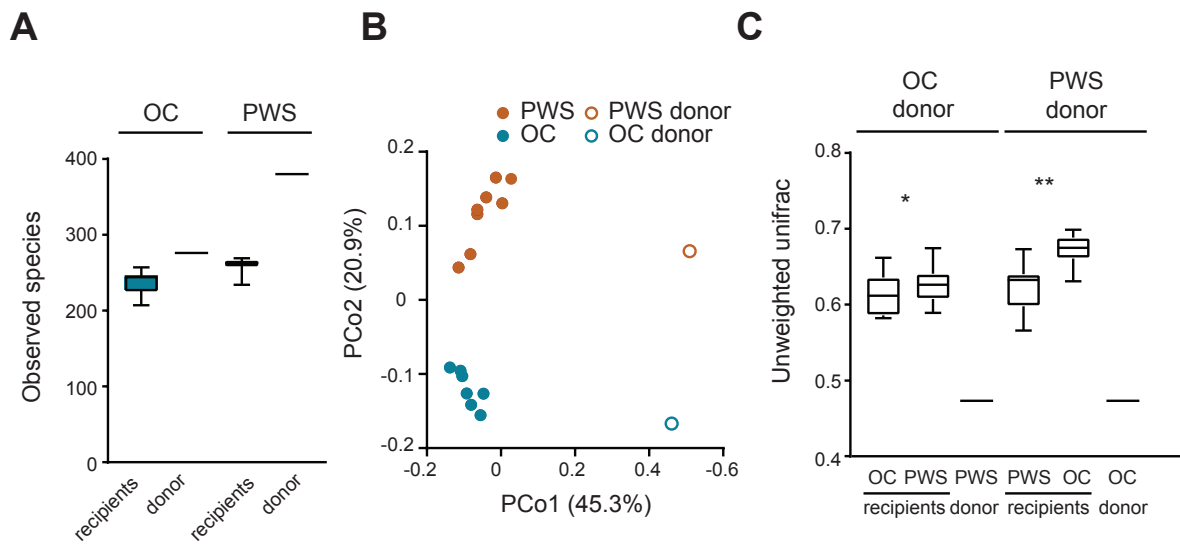

Supplementary Figure 4
